# Supplementary material for: Marital status is an independent prognostic factor for tracheal cancer patients: an analysis of the SEER database
Source: PubMed Central journal article supplement (PMC5363576; doi:10.18632/oncotarget.12809), 2016-10-21
Supplement: oncotarget-07-77152-s001.pdf [file oncotarget-07-77152-s001.pdf]

# Marital status is an independent prognostic factor for tracheal cancer patients: an analysis of the SEER database

## Supplementary Materials

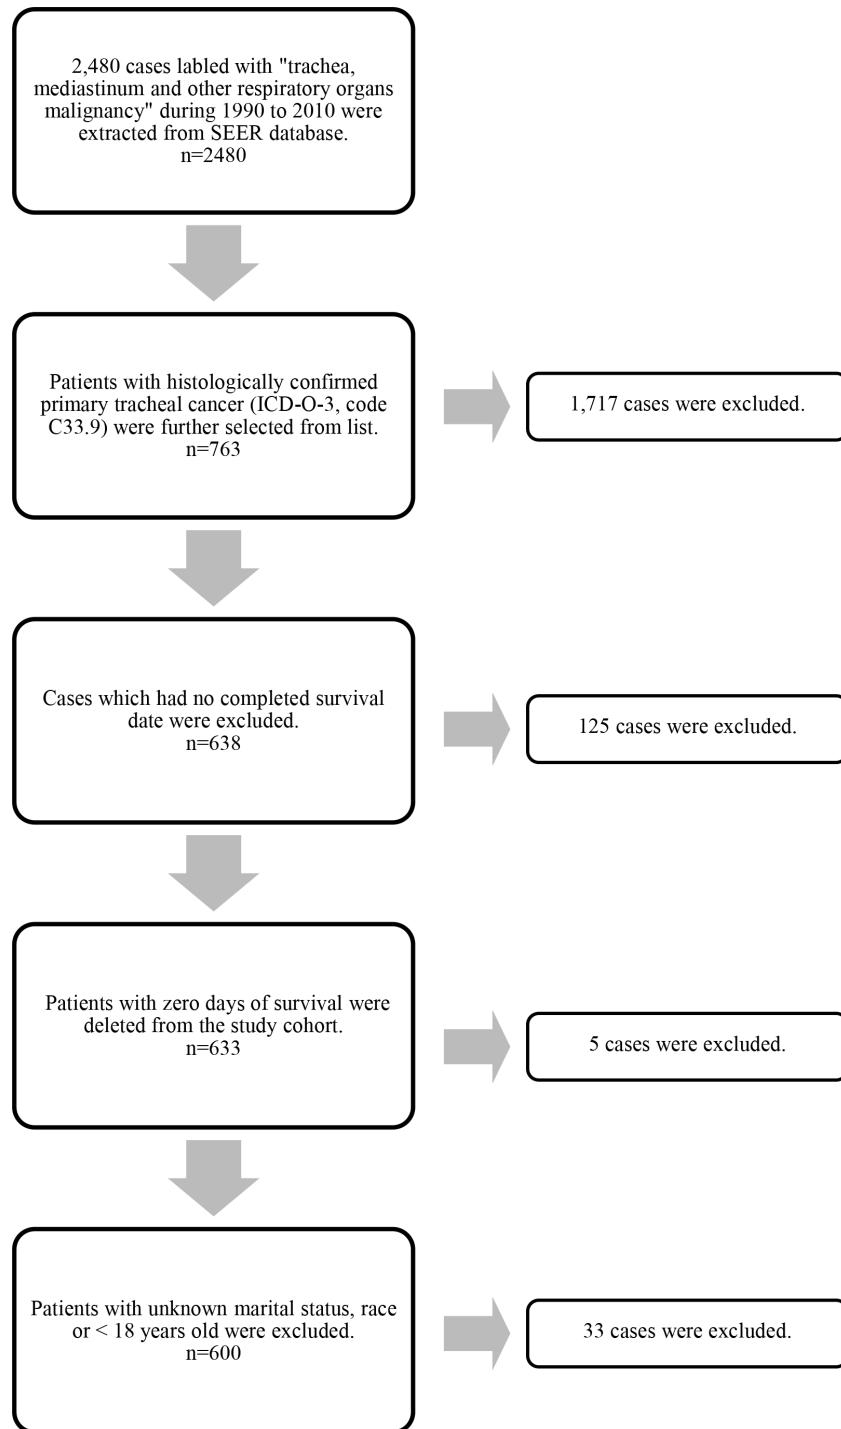

Figure 1: Flow chart of patient selection.

**Supplementary Table S1: Univariate and multivariate survival analysis of tracheal cancer specific survival (TCSS) in non-low grade malignant tracheal cancer patients.** See Supplementary\_Table\_S1

**Supplementary Table S2: Univariate and multivariate survival analysis of TCSS in low grade malignant tracheal cancer patients.** See Supplementary\_Table\_S2

**Supplementary Table S3: Univariate and multivariate survival analysis of overall survival (OS) in low grade malignant tracheal cancer patients.** See Supplementary\_Table\_S3

**Supplementary Table S4: Univariate and multivariate survival analysis of OS in non-low grade malignant tracheal cancer patients.** See Supplementary\_Table\_S4

**Supplementary Table S5: Univariate and multivariate survival analysis for marital status on OS by stage at diagnosis**

| SEER stage                 | 5-year OS | Univariate analysis |         | Multivariate analysis <sup>a</sup> |           |         |
|----------------------------|-----------|---------------------|---------|------------------------------------|-----------|---------|
|                            |           | Log rank $\chi^2$   | P value | HR                                 | 95% CI    | P value |
| <b>Localized (n = 220)</b> |           |                     |         |                                    |           |         |
| <b>Marital status</b>      |           | 2.33                | 0.127   |                                    |           |         |
| Unmarried                  | 38.81%    |                     |         | Reference                          |           |         |
| Married                    | 50.03%    |                     |         | 0.73                               | 0.49–1.10 | 0.131   |
| <b>Regional (n = 205)</b>  |           |                     |         |                                    |           |         |
| <b>Marital status</b>      |           | 2.85                | 0.092   |                                    |           |         |
| Unmarried                  | 25.91%    |                     |         | Reference                          |           |         |
| Married                    | 35.44%    |                     |         | 0.78                               | 0.55–1.11 | 0.164   |
| <b>Distant (n = 96)</b>    |           |                     |         |                                    |           |         |
| <b>Marital status</b>      |           | 1.29                | 0.256   |                                    |           |         |
| Unmarried                  | 9.13%     |                     |         | Reference                          |           |         |
| Married                    | 12.34%    |                     |         | 0.76                               | 0.47–1.25 | 0.277   |

<sup>a</sup>Factors including gender, age, race, histological type, grade, treatment (surgery and radiotherapy), and other socio-economic factors (education, income, employment) had been adjusted in each stage. SEER 1990-2010 (n = 521).

**Supplementary Table S6: Univariate and multivariate survival analysis for marital status on TCSS by stage at diagnosis**

| SEER stage                 | 5-year TCSS | Univariate analysis |         | Multivariate analysis <sup>a</sup> |           |         |
|----------------------------|-------------|---------------------|---------|------------------------------------|-----------|---------|
|                            |             | Log rank $\chi^2$   | P value | HR                                 | 95% CI    | P value |
| <b>Localized (n = 220)</b> |             |                     |         |                                    |           |         |
| <b>Marital status</b>      |             | 3.38                | 0.066   |                                    |           |         |
| Unmarried                  | 66.51%      |                     |         | Reference                          |           |         |
| Married                    | 80.04%      |                     |         | 0.48                               | 0.25–0.91 | 0.023   |
| <b>Regional (n = 205)</b>  |             |                     |         |                                    |           |         |
| <b>Marital status</b>      |             | 2.79                | 0.095   |                                    |           |         |
| Unmarried                  | 37.79%      |                     |         | Reference                          |           |         |
| Married                    | 50.67%      |                     |         | 0.70                               | 0.46–1.07 | 0.098   |
| <b>Distant (n = 96)</b>    |             |                     |         |                                    |           |         |
| <b>Marital status</b>      |             | 1.03                | 0.309   |                                    |           |         |
| Unmarried                  | 16.79%      |                     |         | Reference                          |           |         |
| Married                    | 25.33%      |                     |         | 0.73                               | 0.41      | 1.31    |

<sup>a</sup>Factors including gender, age, race, histological type, grade, treatment (surgery and radiotherapy), and other socio-economic factors (education, income, employment) had been adjusted in each stage. SEER 1990-2010 (n = 521).
